# Supplementary material for: Nanoneedle-decorated NiCo-layered double hydroxide microspheres tuned as high-efficiency electrodes for pseudocapacitors
Source: Royal Society of Chemistry journal article supplement (doi:10.1039/c9ce01252d), 2019-01-01
Supplement: c9ce01252d1.pdf [file c9ce01252d1.pdf]

## **Electronic Supplementary Information**

### **Nanoneedles decorated NiCo-layered double hydroxide microspheres tuned as high-efficiency electrodes for pseudocapacitors**

*Meng Zhang, Yajie Song, Xiaoying Zhao, Ying Guo, Lan Yang and Sailong Xu\**

State Key Laboratory of Chemical Resource Engineering, Beijing University of  
Chemical Technology, Beijing 100029, China

\*Corresponding Author. E-mail: xusl@mail.buct.edu.cn

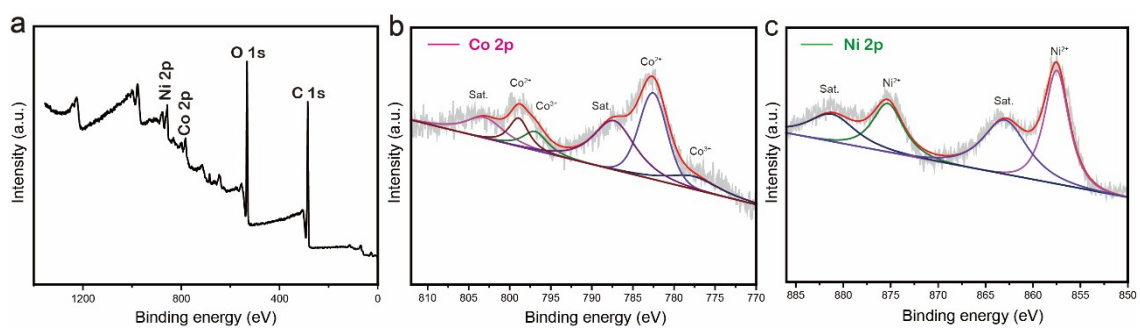

**Fig. S1** XPS spectra of the NiCo-LDH-13 microspheres: (a) a full survey spectrum, (b) Co 2p, (c) Ni 2p.

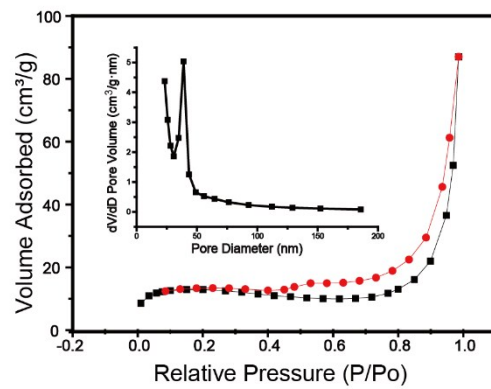

**Fig. S2** N<sub>2</sub> adsorption-desorption isotherms of the NiCo-LDH-13 microspheres.

**Table S1.**

Comparison of specific surface area, pore size distribution, and pore volume between those four different microspheres.

| Sample       | $S_{\text{BET}}$ ( $\text{m}^2 \text{g}^{-1}$ ) | Pore size distribution (nm) | Pore volume ( $\text{cm}^3 \text{g}^{-1}$ ) |
|--------------|-------------------------------------------------|-----------------------------|---------------------------------------------|
| NiCo-LDH-0   | 39.3                                            | 22.81                       | 0.01385                                     |
| NiCo-LDH-6.5 | 27.3                                            | 24.06                       | 0.01328                                     |
| NiCo-LDH-13  | 127.8                                           | 23.03                       | 0.2624                                      |
| NiCo-LDH-26  | 8.4                                             | 33.36                       | 0.0204                                      |

**Table S2.**

Comparison of electrochemical performance between our NiCo-LDH-13 electrode and the NiCo-LDH electrodes reported previously.

| Supercapacitor electrode materials                                                                          | Specific capacitance (F g <sup>-1</sup> ) | Rate Capability                        | Cyclic Stability                                 | References    |
|-------------------------------------------------------------------------------------------------------------|-------------------------------------------|----------------------------------------|--------------------------------------------------|---------------|
| NiCo-LDH nanoflakes                                                                                         | 1372                                      | 67.8% from 1 to 30 A g <sup>-1</sup>   | 94.3% after 2000 cycles at 2 A g <sup>-1</sup>   | <sup>1</sup>  |
| $\alpha$ -Ni <sub>0.5</sub> Co <sub>0.5</sub> hydroxide                                                     | 1600                                      | -                                      | 64% after 1000 cycles at 10 A g <sup>-1</sup>    | <sup>2</sup>  |
| Ni <sub>50</sub> Co <sub>50</sub> -LDH ultrathin nanosheets                                                 | 1537 (0.5 A g <sup>-1</sup> )             | 76.8% from 0.5 to 10 A g <sup>-1</sup> | 80.3% after 1000 cycles at 2 A g <sup>-1</sup>   | <sup>3</sup>  |
| Urchin-Like Ni <sub>1/3</sub> Co <sub>2/3</sub> (CO <sub>3</sub> ) <sub>1/2</sub> (OH)·0.11H <sub>2</sub> O | 1226.8                                    | 92.1% from 0.5 to 20 A g <sup>-1</sup> | 97.7% after 10000 cycles at 5 A g <sup>-1</sup>  | <sup>4</sup>  |
| NiCo-LDH nanoflakes-CNTs                                                                                    | 1151                                      | 60.9% from 1 to 70 A g <sup>-1</sup>   | 77% after 10000 cycles at 10 A g <sup>-1</sup>   | <sup>5</sup>  |
| NiCo-LDH derived from ZIF-67                                                                                | 1530                                      | 49.5% from 1 to 10 A g <sup>-1</sup>   | 89.3% after 1000 cycles at 5 A g <sup>-1</sup>   | <sup>6</sup>  |
| 3D flower-like $\alpha$ -phase NiCo-LDH microsphere                                                         | 1120                                      | 88.9% from 1 to 10 A g <sup>-1</sup>   | 122.5% after 2000 cycles at 10 A g <sup>-1</sup> | <sup>7</sup>  |
| HCNs@NiCo-LDH                                                                                               | 2558                                      | 74.9% from 1 to 20 A g <sup>-1</sup>   | -                                                | <sup>8</sup>  |
| NiCo-LDH/PANI/BC                                                                                            | 1690                                      | 46% from 1 to 15 A g <sup>-1</sup>     | 83.2% after 5000 cycles                          | <sup>9</sup>  |
| Ultrathin NiCo-LDH-graphene nanosheets                                                                      | 1489                                      | 68% from 1 to 100 A g <sup>-1</sup>    | 80% after 5000 cycles at 6 A g <sup>-1</sup>     | <sup>10</sup> |
| flower-on-sheet NiCo-LDH                                                                                    | 1187.2                                    | 71% from 1 to 30 A g <sup>-1</sup>     | 83% after 1000 cycles at 10 A g <sup>-1</sup>    | <sup>11</sup> |
| NiCo-LDH/CFC                                                                                                | 1510                                      | 83.4% from 1 to 15 A g <sup>-1</sup>   | 84.6% after 5000 cycles at 10 A g <sup>-1</sup>  | <sup>12</sup> |
| NiCo-LDH-13                                                                                                 | 1644                                      | 90.5% from 1 to 10 A g <sup>-1</sup>   | 93% after 1000 cycles at 10 A g <sup>-1</sup>    | This work     |

## References

1. M. Jing, H. Hou, C. E. Banks, Y. Yang, Y. Zhang and X. Ji, *ACS Appl. Mater. Interfaces*, 2015, **7**, 22741-22744.
2. D. Xia, H. Chen, J. Jiang, L. Zhang, Y. Zhao, D. Guo and J. Yu, *Electrochim. Acta*, 2015, **156**, 108-114.
3. R. Li, Z. Hu, X. Shao, P. Cheng, S. Li, W. Yu, W. Lin and D. Yuan, *Sci. Rep.*, 2016, **6**, 18737.
4. W. Wei, S. Cui, L. Ding, L. Mi, W. Chen and X. Hu, *ACS Appl. Mater. Interfaces*, 2017, **9**, 40655-40670.
5. M. Li, K. Y. Ma, J. P. Cheng, D. Lv and X. B. Zhang, *J. Power Sources*, 2015, **286**, 438-444.
6. P. Wang, Y. Li, S. Li, X. Liao and S. Sun, *Journal of Materials Science: Materials in Electronics*, 2017, **28**, 9221-9227.
7. J. Li, M. Wei, W. Chu and N. Wang, *Chem. Eng. J.*, 2017, **316**, 277-287.
8. J. Xu, C. Ma, J. Cao and Z. Chen, *Dalton Trans*, 2017, **46**, 3276-3283.
9. H. Wu, Y. Zhang, W. Yuan, Y. Zhao, S. Luo, X. Yuan, L. Zheng and L. Cheng, *J. Mater. Chem. A*, 2018, **6**, 16617-16626.
10. J. Yang, C. Yu, C. Hu, M. Wang, S. Li, H. Huang, K. Bustillo, X. Han, C. Zhao, W. Guo, Z. Zeng, H. Zheng and J. Qiu, *Adv. Funct. Mater.*, 2018, **28**, 1803272.
11. Y. Zhou, J. Li, Y. Yang, B. Luo, X. Zhang, E. Fong, W. Chu and K. Huang, *J. Alloys Compd.*, 2019, **788**, 1029-1036.
12. Y. Li, L. Shan, Y. Sui, J. Qi, F. Wei, Y. He, Q. Meng, Y. Ren and J. Liu, *J. Mater. Sci.: Mater. Electron.*, 2019, **30**, 13360-13371.

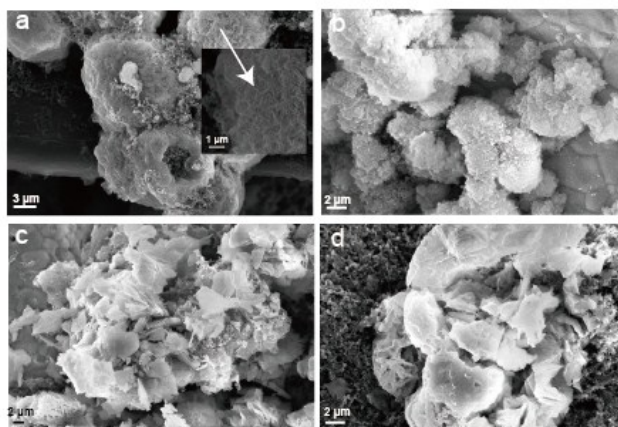

**Fig. S3** SEM images of the (a) NiCo-LDH-13, (b) NiCo-LDH-0, (c) NiCo-LDH-6.5, (d) NiCo-LDH-26 after 1000 cycles at a current of  $1 \text{ A g}^{-1}$ .
